# Supplementary material for: Recognizing Cardiovascular Risk After Preeclampsia: The P4 Study
Source: PubMed Central journal article supplement — J Am Heart Assoc. 2020 Nov 10;9(22):e018604. doi: 10.1161/JAHA.120.018604 (PMC7763721; doi:10.1161/jaha.120.018604), 2020-11-10
Supplement: JAH3-9-e018604-s001.pdf [file JAH3-9-e018604-s001.pdf]

# **Supplemental Material**

**Table S1. Characteristics of study participants and non-participants.** ‘Booking’ is the gestation at 1<sup>st</sup> presentation to the primary care physician or hospital clinic. GP = general practitioner/primary care physician; BMI = body mass index; SBP = systolic BP; DBP = diastolic BP.

|                                | Normotensive Pregnancies |      |    |                  |      |    | p-value |
|--------------------------------|--------------------------|------|----|------------------|------|----|---------|
|                                | Participants             |      |    | Non participants |      |    |         |
|                                | n                        | Mean | SD | n                | Mean | SD |         |
| BMI- at booking                | 302                      | 24   | 5  | 2451             | 24   | 5  | 0.150   |
| Gestation Booking BP (weeks)   | 281                      | 10   | 5  | 2449             | 14   | 7  | <0.001  |
| Booking GP SBP (mmHg)          | 281                      | 108  | 11 | 2222             | 101  | 11 | <0.001  |
| Booking GP DBP (mmHg)          | 281                      | 67   | 8  | 2222             | 62   | 7  | <0.001  |
| Gestation at Birth (weeks)     | 302                      | 39   | 2  | 2452             | 39   | 2  | 0.100   |
| Age at First assessment (yrs.) | 302                      | 33   | 5  | 2452             | 31   | 5  | <0.001  |
| Apgar 1                        | 300                      | 9    | 1  | 2438             | 9    | 1  | 0.069   |
| Apgar 5                        | 300                      | 9    | 1  | 2439             | 9    | 1  | 0.827   |

|                                | Pre-Eclampsia |      |    |                  |      |    | p-value |
|--------------------------------|---------------|------|----|------------------|------|----|---------|
|                                | Participants  |      |    | Non participants |      |    |         |
|                                | n             | Mean | SD | n                | Mean | SD |         |
| BMI- at booking                | 90            | 26   | 5  | 55               | 27   | 6  | 0.230   |
| Gestation Booking BP (weeks)   | 73            | 10   | 5  | 55               | 12   | 8  | 0.046   |
| Booking GP SBP (mmHg)          | 74            | 113  | 12 | 52               | 110  | 11 | 0.161   |
| Booking GP DBP (mmHg)          | 74            | 71   | 8  | 52               | 69   | 8  | 0.304   |
| Gestation at Birth (weeks)     | 90            | 37   | 3  | 55               | 38   | 2  | 0.326   |
| Age at First assessment (yrs.) | 90            | 32   | 5  | 55               | 31   | 5  | 0.679   |
| Apgar 1                        | 90            | 8    | 2  | 55               | 8    | 2  | 0.019   |
| Apgar 5                        | 90            | 9    | 1  | 55               | 9    | 1  | 0.136   |

|                                      | Normotensive Pregnancies (%) |                           |         | Pre-Eclampsia (%)   |                         |         |
|--------------------------------------|------------------------------|---------------------------|---------|---------------------|-------------------------|---------|
|                                      | Participants (n=302)         | Non participants (n=2452) | p-value | Participants (n=90) | Non participants (n=55) | p-value |
| <b>Labour Onset -</b><br>Spontaneous | 58                           | 45                        | <0.001  | 9                   | 9                       | 0.175   |
|                                      | Induced                      | 32                        |         | 66                  | 78                      |         |
|                                      | No Labour                    | 10                        |         | 26                  | 13                      |         |
| Vaginal Birth                        | 81                           | 71                        | <0.001  | 51                  | 64                      | 0.141   |
| MgSO4 given                          | 0                            | 0.1                       | 0.015   | 24.4                | 3.6                     | 0.001   |
| Baby Gender- Male                    | 51                           | 52                        | 0.661   | 48                  | 49                      | 0.878   |

**Table S2. Frequency of high blood pressure at six months postpartum detected by various methods, using only awake ABPM as the gold standard method for diagnosing high BP.**

|                       |     | Above SBP<br>Routine<br>sphygmomanome<br>try using new<br>normal range | Above SBP<br>Routine<br>sphygmomanome<br>try using<br>traditional<br>definitions | Above SBP<br>Routine<br>sphygmomanome<br>try using<br>AHA/ACC<br>definitions | Above SBP<br>Central<br>using new<br>normal<br>range | Above SBP<br>Central<br>using<br>traditional<br>values |
|-----------------------|-----|------------------------------------------------------------------------|----------------------------------------------------------------------------------|------------------------------------------------------------------------------|------------------------------------------------------|--------------------------------------------------------|
| Above<br>awake<br>SBP | No  | 9                                                                      | 0                                                                                | 2                                                                            | 8                                                    | 6                                                      |
|                       | Yes | 3                                                                      | 0                                                                                | 1                                                                            | 3                                                    | 1                                                      |
| Total                 |     | 12                                                                     | 0                                                                                | 3                                                                            | 11                                                   | 7                                                      |

|                       |     | Above DBP<br>Routine<br>sphygmomanome<br>try using new<br>normal range | Above DBP<br>Routine<br>sphygmomanome<br>try using<br>traditional<br>definitions | Above DBP<br>Routine<br>sphygmomanome<br>try using<br>AHA/ACC<br>definitions | Above DBP<br>Central<br>using new normal<br>range |
|-----------------------|-----|------------------------------------------------------------------------|----------------------------------------------------------------------------------|------------------------------------------------------------------------------|---------------------------------------------------|
| Above<br>awake<br>DBP | No  | 12                                                                     | 2                                                                                | 6                                                                            | 15                                                |
|                       | Yes | 5                                                                      | 1                                                                                | 7                                                                            | 4                                                 |
| Total                 |     | 17                                                                     | 3                                                                                | 13                                                                           | 19                                                |

**Table S3. Parameters for formerly pre-eclamptic women with high blood pressure defined by the new normal range vs. formerly pre-eclamptic women with blood pressure in the normal range at 6 months post-partum.**

|                                       | Pre-eclampsia with Routine BP above New Normal |       |       | Pre-eclampsia with normal BP 6 months post-partum |       |      | p-value |
|---------------------------------------|------------------------------------------------|-------|-------|---------------------------------------------------|-------|------|---------|
|                                       | n                                              | Mean  | SD    | n                                                 | Mean  | SD   |         |
| BMI                                   | 11                                             | 30.1  | 7.4   | 79                                                | 27.5  | 5.6  | 0.276   |
| Creatinine (mg/dL)                    | 11                                             | 0.7   | 0.1   | 78                                                | 0.7   | 0.1  | 0.494   |
| eGFR (mL/min)                         | 11                                             | 96.2  | 8.5   | 78                                                | 96.8  | 7.6  | 0.821   |
| ALP (IU)                              | 10                                             | 80.3  | 16.7  | 77                                                | 83.7  | 21.1 | 0.572   |
| GGT (IU)                              | 10                                             | 29.4  | 22.9  | 77                                                | 18.8  | 24.4 | 0.198   |
| ALT (U/L)                             | 10                                             | 22.5  | 12.9  | 77                                                | 20.9  | 11.3 | 0.717   |
| AST (U/L)                             | 10                                             | 21.7  | 6.2   | 75                                                | 20.8  | 5.7  | 0.662   |
| Glucose (mg/dL)                       | 11                                             | 86.4  | 8.2   | 78                                                | 85.7  | 6.9  | 0.802   |
| Urate (mg/dL)                         | 11                                             | 5.39  | 0.84  | 77                                                | 4.86  | 1.07 | 0.076   |
| White cell count (10 <sup>9</sup> /L) | 11                                             | 6.0   | 1.5   | 78                                                | 5.8   | 1.9  | 0.706   |
| Hb (g/dL)                             | 11                                             | 13.1  | 1.2   | 78                                                | 13.0  | 0.9  | 0.698   |
| Platelets (10 <sup>9</sup> /L)        | 11                                             | 264.6 | 45.5  | 77                                                | 259.4 | 61.0 | 0.735   |
| Cholesterol (mg/dL)                   | 11                                             | 185.3 | 21.3  | 77                                                | 179.8 | 35.6 | 0.476   |
| LDL (mg/dL)                           | 11                                             | 112.3 | 23.9  | 77                                                | 104.6 | 31.5 | 0.355   |
| HDL (mg/dL)                           | 11                                             | 56.2  | 17.9  | 78                                                | 59.8  | 14.3 | 0.525   |
| Triglyceride (mg/dL)                  | 11                                             | 86.2  | 68.2  | 77                                                | 76.1  | 48.4 | 0.647   |
| Aldosterone (ng/dL)                   | 10                                             | 11.7  | 8.8   | 77                                                | 10.7  | 9.6  | 0.746   |
| Renin (mU/L)                          | 9                                              | 10.6  | 8.7   | 75                                                | 16.9  | 11.1 | 0.071   |
| Aldosterone:Renin ratio               | 9                                              | 105.1 | 218.3 | 75                                                | 24.5  | 23.6 | 0.300   |
| Insulin (mU/L)                        | 11                                             | 12.3  | 9.4   | 77                                                | 9.2   | 8.1  | 0.308   |
| HBA1C (%)                             | 11                                             | 5.2   | 0.2   | 78                                                | 5.2   | 0.3  | 0.922   |
| Vitamin D (ng/mL)                     | 11                                             | 27.2  | 7.7   | 77                                                | 27.3  | 7.4  | 0.995   |
| HOMA score                            | 11                                             | 2.7   | 2.0   | 77                                                | 2.0   | 1.7  | 0.304   |
| Urine albumin/creat (mg/g)            | 11                                             | 25.8  | 31.1  | 77                                                | 18.7  | 27.5 | 0.486   |
